# Supplementary material for: A novel immunoassay technique using principal component analysis for enhanced detection of emerging viral variants
Source: Royal Society of Chemistry journal article supplement (doi:10.1039/d4lc00505h), 2024-01-01
Supplement: d4lc00505h1.xlsx [file d4lc00505h1.xlsx]

## Sheet: Sheet1
PCA
Class	R3	G3	B3	R2	G2	B2	ID
Control	7.72	6.73	3.33	0.12	0.06	-0.31	1
Control	8.92	8.22	4.56	0.06	0.72	0.01	1
Control	2.11	1.59	0.7	0.12	0.67	-0.02	1
Alpha	79.42	92.88	75.03	64.98	67.8	55.93	2
Alpha	100.82	112.5	94.7	73.16	74.22	64.15	2
Alpha	69.43	83.4	67.46	80.78	81.36	69.38	2
Omicron	25.25	23.86	17.95	0.12	0.44	0.14	3
Omicron	39.97	36.9	30.06	0.13	0.82	0.35	3
Omicron	31.99	29.48	23.68	-0.12	0.53	-0.1	3
BA1	129.93	126.54	113.51	1.09	0.17	0.38	4
BA1	129.91	127.4	114.6	1.32	1.05	1.19	4
BA1	110.38	108.7	96.3	0.41	1.25	0.87	4
Control	12.94	11.85	7.93	-0.02	0.08	0	5
Alpha	77.39	90.07	72.7	76.46	77.48	66.15	5
Omicron	27.72	26.32	20.31	0.3	0.3	-0.02	5
