# Supplementary material for: A novel immunoassay technique using principal component analysis for enhanced detection of emerging viral variants
Source: Royal Society of Chemistry journal article supplement (doi:10.1039/d4lc00505h), 2024-01-01
Supplement: d4lc00505h3.pdf [file d4lc00505h3.pdf]

## Supporting Information

### A novel immunoassay technique using principal component analysis for enhanced detection of emerging viral variants

J. Mata Calidonio <sup>a</sup>, A. I. Maddox <sup>b</sup>, K. Hamad-Schifferli <sup>a,c\*</sup>

<sup>a</sup>Department of Engineering, <sup>b</sup>Department of Biology, <sup>c</sup>School for the Environment, University of Massachusetts Boston, 100 Morrissey Blvd., Boston, MA 02125 USA

\*Corresponding author: [kim.hamad@umb.edu](mailto:kim.hamad@umb.edu)

|       |     |                                                                 |     |
|-------|-----|-----------------------------------------------------------------|-----|
| Alpha | 319 | RVQPTESIVRFPNITNLCPFGEVFNATRFASVYAWNRKRISNCVADYSVLYNSASFSTFK    | 378 |
| BA.5  | 328 | RVQPTESIVRFPNITNLCPFDEVFNATRFASVYAWNRKRISNCVADYSVLYNFAPFFAFK    | 387 |
| BA.1  | 328 | RVQPTESIVRFPNITNLCPFDEVFNATRFASVYAWNRKRISNCVADYSVLYNLAPFFTFK    | 387 |
| Alpha | 379 | CYGVSP TKLNDLCFTNVYADSFVIRGDEV RQIAPGQTGKIADYNYKLPDDFTGCVIAWNS  | 438 |
| BA.5  | 388 | CYGVSP TKLNDLCFTNVYADSFVIRGNEVSQIAPGQTGNIADYNYKLPDDFTGCVIAWNS   | 447 |
| BA.1  | 388 | CYGVSP TKLNDLCFTNVYADSFVIRGDEV RQIAPGQTGNIADYNYKLPDDFTGCVIAWNS  | 447 |
| Alpha | 439 | NNLDSKVG GNYNYLRYLFRKSNLKP FERDISTE IYQAGSTPCNGVEGFNCYFPLQSYGFQ | 498 |
| BA.5  | 448 | NKLDSKVG GNYNYRYLFRKSNLKP FERDISTE IYQAGNKPCNGVAGVNCYFPLQSYGFR  | 507 |
| BA.1  | 448 | NKLDSKVS GNYNYLRYLFRKSNLKP FERDISTE IYQAGNKPCNGVAGFNCYFPLQSYSFR | 507 |
| Alpha | 499 | PTNGVGYQP YRWWVLSFELLHAPATVCGPKKSTNLVKNKCVNF                    | 541 |
| BA.5  | 508 | PTYGVGHQP YRWWVLSFELLHAPATVCGPKKSTNLVKNKCVNF                    | 550 |
| BA.1  | 508 | PTYGVGHQP YRWWVLSFELLHAPATVCGPKKSTNLVKNKCVNF                    | 550 |

**Supporting Information Figure S1. Sequences for spike RBD protein of Alpha, Omicron BA.5, and Omicron BA.1 Similarities relative to alpha in highlighted in orange.**

First Trial

1. Casein
2. HS, RB, GNS-Ab1, target
3. HS, RB, NP-Ab2 IgG
4. Casein

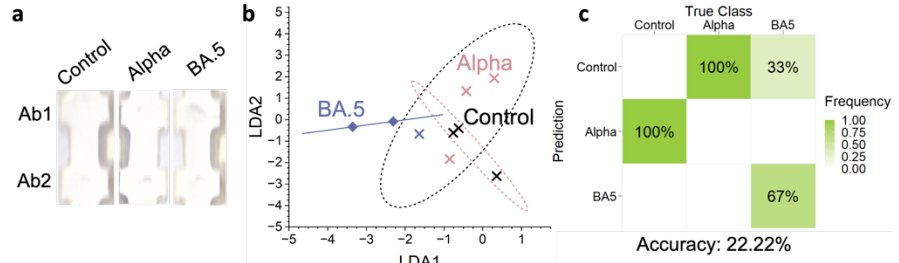

Second Trial

1. HS, RB, GNS-Ab1, Quencher, target
2. HS, RB, NP-Ab2 IgG
3. Casein

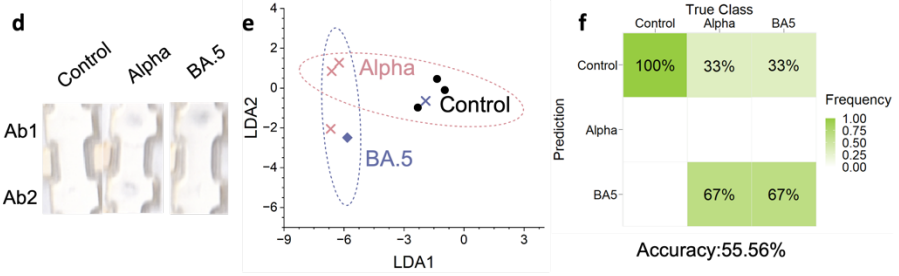

Third Trial

1. HS, RB, GNS-Ab1, Tris Buffer, target
2. HS, RB, NP-Ab2 IgG
3. Casein

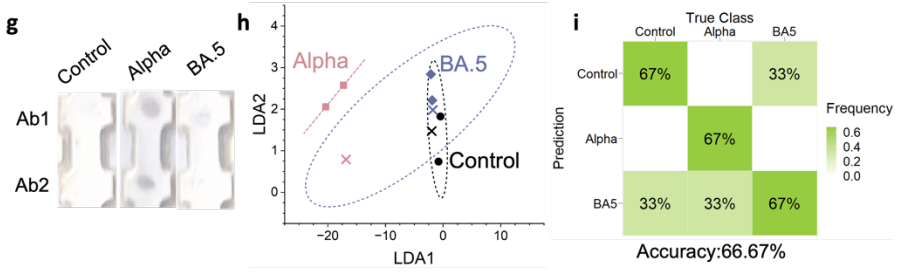

Fourth Trial

1. HS, RB, GNS-Ab1, Tris Buffer, target
2. Casein
3. HS, RB, NP-Ab2 IgG
4. Casein

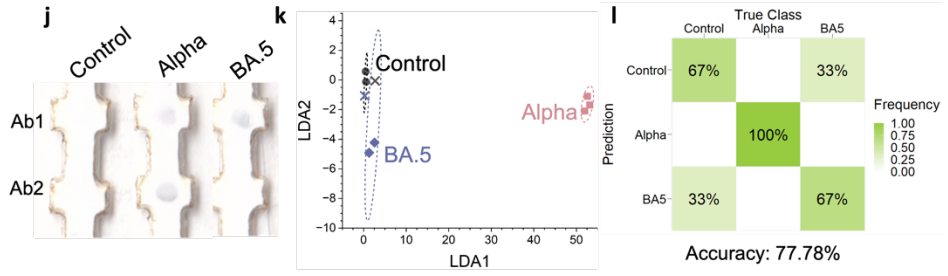

Fifth Trial

1. HS, RB, GNS-Ab1, Tris Buffer, target
2. Casein
3. HS, RB, NP-Ab2 IgG
4. Higher Volume- Casein

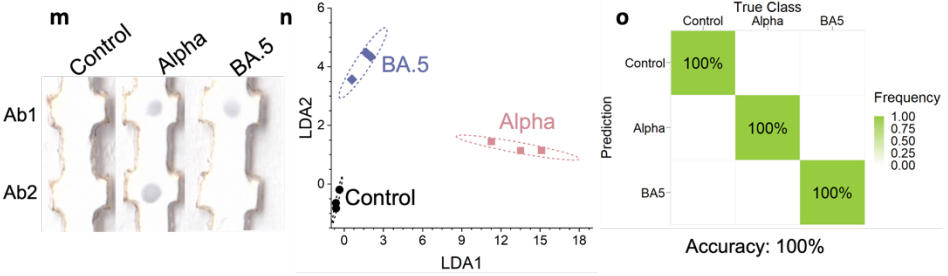

**Supporting Information Figure S2. ML trials used to iterate on different running conditions and resulting LDA and confusion matrix showing the test accuracy. For each trial it results in strip images for the strips run with the negative control, Alpha, and BA.5 (a, d, g, j, m); LDA plots of the resulting image analysis (b, e, h, k, n) where misclassified classes are shown as X's; and confusion matrices (c, f, l, o) where diagonals are correctly classified and off diagonal incorrectly classified classes.**

**a** GNS-Ab1/Ab1 run with alpha

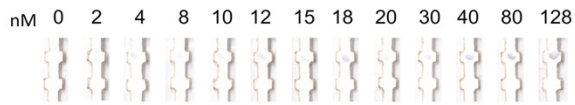

**b** GNS-Ab1/Ab1 run with BA.5

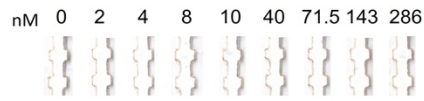

**c** NP-Ab2/Ab2 run with alpha

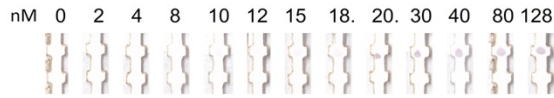

**d** NP-Ab2/Ab2 run with BA.5

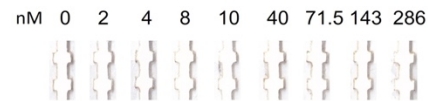

**e**

| Concentration (nM) | GNS-Ab1/Ab1 |        |        | NP-Ab2/Ab2 |        |        |
|--------------------|-------------|--------|--------|------------|--------|--------|
|                    | R           | G      | B      | R          | G      | B      |
| 0                  | 249.1       | 249.08 | 250.54 | 253.95     | 253.71 | 253.83 |
| 2                  | 250.12      | 250.13 | 251.16 | 253.67     | 253.34 | 252.59 |
| 4                  | 242.79      | 242.69 | 246.47 | 254.84     | 253.16 | 254    |
| 8                  | 252.74      | 252.47 | 252.84 | 254.96     | 253.04 | 254    |
| 10                 | 243.9       | 243.97 | 245.5  | 253.13     | 247.98 | 252.15 |
| 12                 | 238.02      | 237.36 | 241.25 | 253.55     | 251.63 | 252.47 |
| 15                 | 245.75      | 245.3  | 247.51 | 251.39     | 246.09 | 250.31 |
| 18                 | 227.29      | 226.8  | 231.86 | 252.24     | 246.54 | 251.51 |
| 20                 | 246.37      | 246.17 | 247.94 | 215.67     | 198.68 | 212.54 |
| 30                 | 240.13      | 239.71 | 244.43 | 224.7      | 208.7  | 221.04 |
| 40                 | 224.47      | 223.86 | 228.58 | 231.4      | 215.96 | 229.17 |
| 80                 | 216.96      | 216.3  | 221.08 | 232.92     | 220.14 | 231.43 |
| 128                | 217.37      | 217.28 | 222.22 | 222.58     | 209.74 | 221.99 |
| 0                  | 253.67      | 253.45 | 253.56 | 253.44     | 253.38 | 253.41 |
| 2                  | 251.93      | 252.02 | 252.71 | 254.62     | 253.3  | 253.98 |
| 4                  | 251.96      | 251.54 | 252.32 | 253.87     | 252.41 | 252.25 |
| 8                  | 246.34      | 246.62 | 249.58 | 254.88     | 253.74 | 252.93 |
| 10                 | 244.94      | 244.65 | 247.05 | 254.91     | 253.5  | 253.39 |
| 40                 | 254.02      | 253.5  | 251.65 | 254.64     | 253.57 | 253.7  |
| 71.5               | 253.72      | 253.64 | 253.68 | 254.89     | 253.11 | 254.02 |
| 143                | 253.56      | 252.88 | 251.37 | 254.86     | 253.44 | 253.33 |
| 286                | 242.87      | 242.79 | 246.14 | 254.55     | 253.42 | 253.58 |

Supporting Information Figure S3. a-d) Strips run for LODs in SI Figure S7. Antigen concentrations in nM. e) RGB values for LOD strips.

**GNS-Ab1/Ab1**

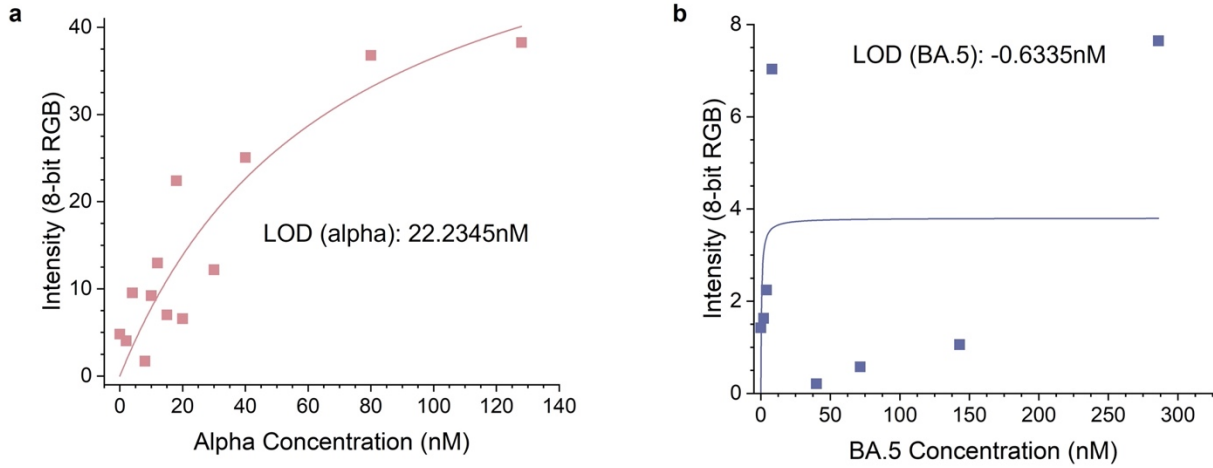

**NP-Ab2/Ab2**

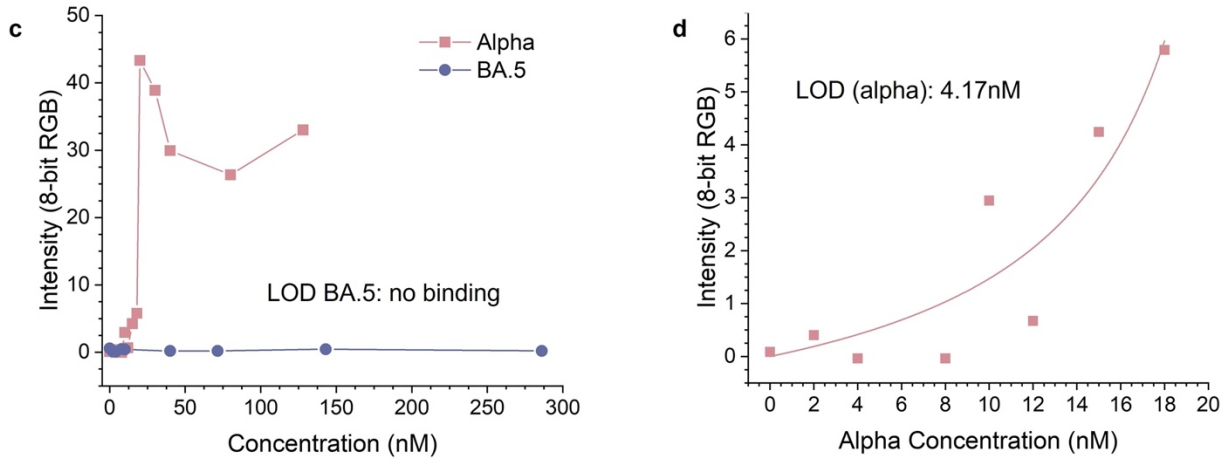

**Supporting Information Figure S4. Concentration dependence of the strip signals for LOD calculations (points) and fit to a Langmuir equation (line):  $y = (k_1x)/(1+k_2x)$ . a) GNS-Ab1/Ab1 run with alpha; b) GNS-Ab1/Ab1 run with BA.5; c) NP-Ab2/Ab2 with alpha (pink squares) and BA.5 (blue circles); d) zoom in of non-hook region for NP-Ab2/Ab2 with alpha. Fits: For Ab1 with alpha,  $k_1 = 0.8927$  and  $k_2 = 0.0144$ . For Ab2 with alpha,  $k_1 = 0.0436$  and  $k_2 = -0.049$ . For BA.5, reliable Keff values could not be determined.**

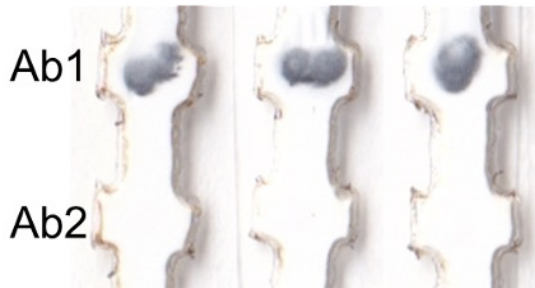

Supporting Information Figure S5. BA.1 unknowns run in triplicates.

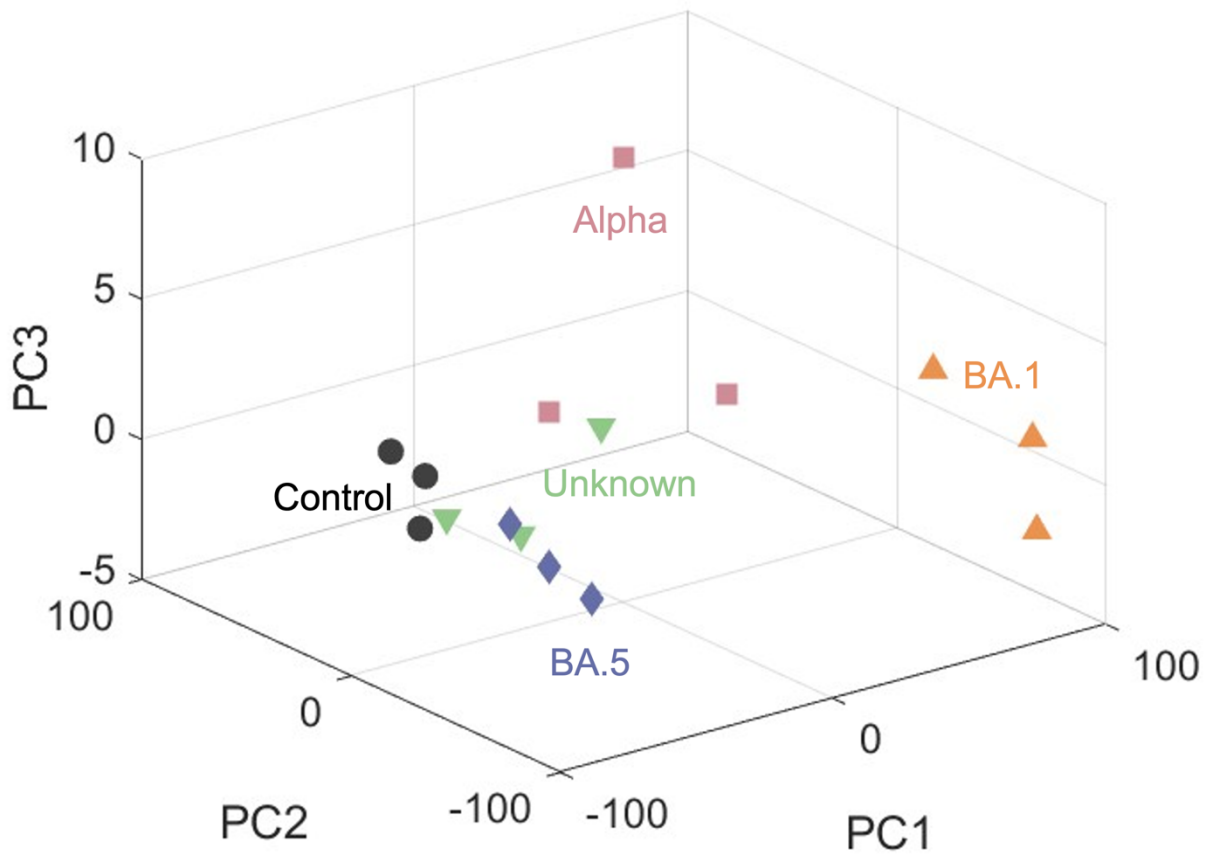

Supporting Information Figure S6. PCA in 3D of unknowns run (control, alpha, and BA.5, green triangles) and BA.1 (orange triangles).

**Blue GNS-Ab2**

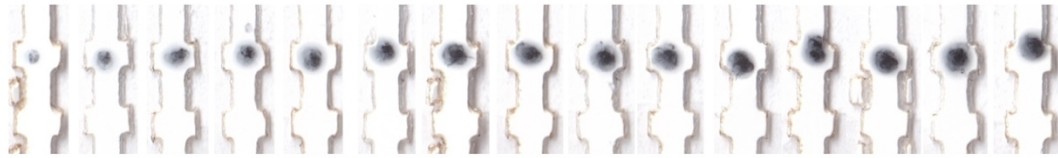

|                             |   |   |   |   |   |   |   |   |   |    |    |    |    |    |    |
|-----------------------------|---|---|---|---|---|---|---|---|---|----|----|----|----|----|----|
| Number of 0.2 $\mu$ L Spots | 1 | 2 | 3 | 4 | 5 | 6 | 7 | 8 | 9 | 10 | 11 | 12 | 13 | 14 | 15 |
|-----------------------------|---|---|---|---|---|---|---|---|---|----|----|----|----|----|----|

**Red NP-Ab1**

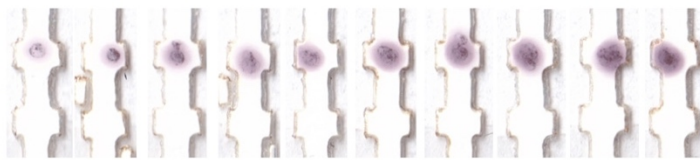

|                             |   |   |   |   |   |   |   |   |   |    |
|-----------------------------|---|---|---|---|---|---|---|---|---|----|
| Number of 0.2 $\mu$ L Spots | 1 | 2 | 3 | 4 | 5 | 6 | 7 | 8 | 9 | 10 |
|-----------------------------|---|---|---|---|---|---|---|---|---|----|

**Supporting Information Figure S7. Spotted Blue GNS-Ab2 and Red NP-Ab1 in aliquots for measuring the range of possible RGB values.**
